# Supplementary material for: Administration of Enfortumab Vedotin after Immune-Checkpoint Inhibitor and the Prognosis in Japanese Metastatic Urothelial Carcinoma: A Large Database Study on Enfortumab Vedotin in Metastatic Urothelial Carcinoma
Source: MDPI journal article supplement (doi:10.3390/cancers15174227), 2023-08-23
Supplement: s1 [file s1]

**Table S1.** Multivariable analyses for cancer specific survival

| Variables      | HR   | 95%CI |       | p value |
|----------------|------|-------|-------|---------|
|                |      | Lower | Upper |         |
| Age 70yrs over | 0.83 | 0.60  | 1.14  | 0.241   |
| Male           | 0.95 | 0.65  | 1.40  | 0.801   |
| Bladder Cancer | 0.77 | 0.55  | 1.09  | 0.143   |
| EV induction   | 0.82 | 0.58  | 1.16  | 0.262   |
| Cystectomy     | 1.19 | 0.74  | 1.92  | 0.466   |

HR: hazard ratio, EV: enfortumab vedotin

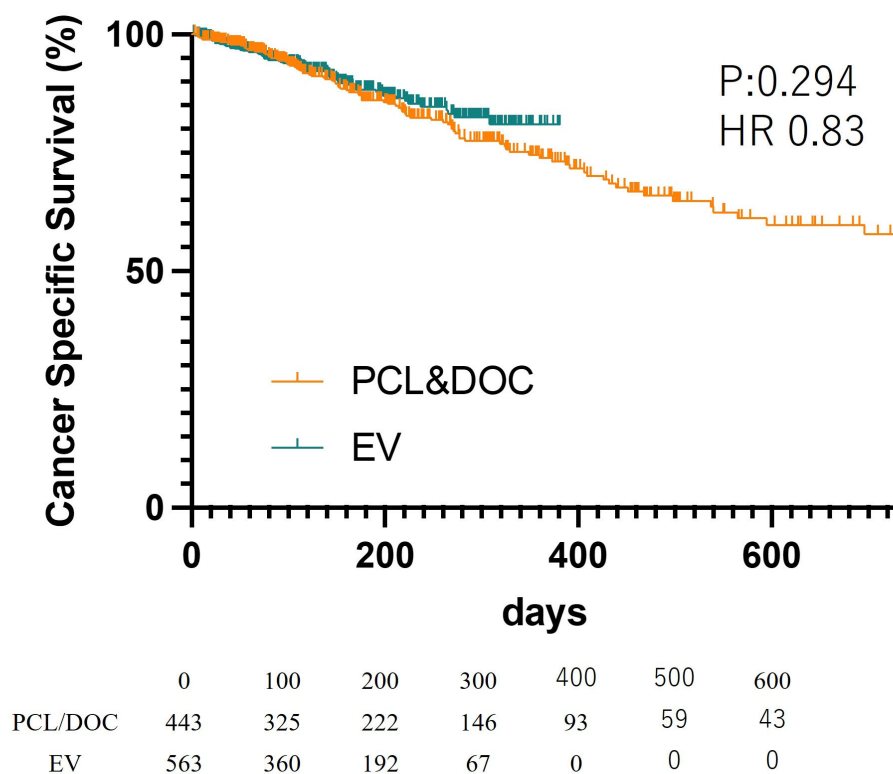

EV: Enfortumab vedotin, DOC: docetaxel, PCL: paclitaxel

**Figure S1.** Kaplan Meier Curve for cancer specific survival: paclitaxel/docetaxel vs. enfortumab vedotin.
